# Supplementary material
Source: Springer Nature journal article supplement (https://www.springermedizin.de/resource/supplementary/12935_2013_538_MOESM2_ESM.pdf/9540810)

**A**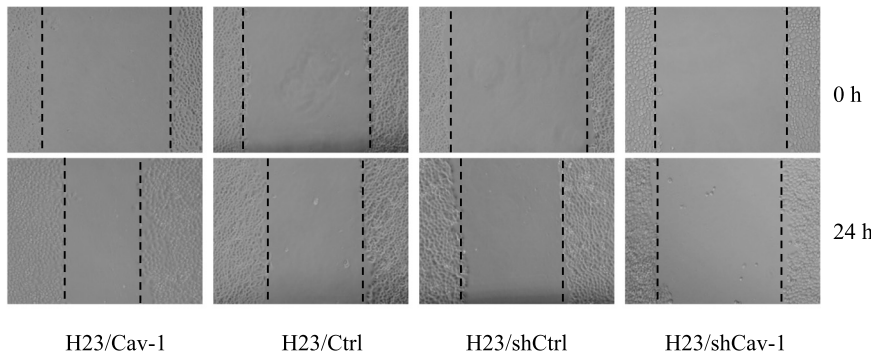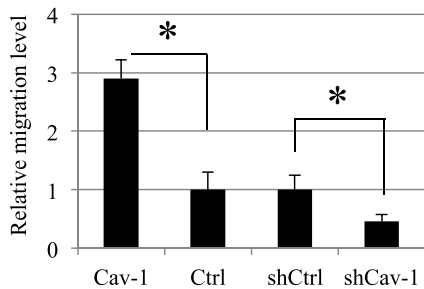**B**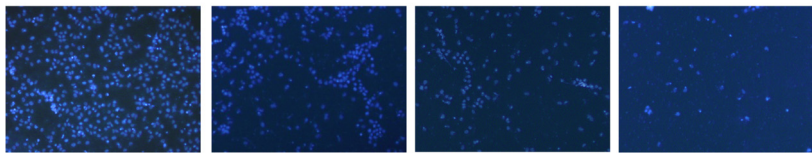

H23/Cav-1

H23/Ctrl

H23/shCtrl

H23/shCav-1

Supplement: MOESM2 [file 9540810]
